# Supplementary material for: Increased inflammation and endothelial markers in patients with late severe post-thrombotic syndrome
Source: PubMed Central journal article supplement (PMC6964981; doi:10.1371/journal.pone.0227150), 2020-01-16
Supplement: pone.0227150.s001.pdf [file pone.0227150.s001.pdf]

| <b>Age</b> | <b>Gender</b> | <b>Number of episodes</b> | <b>Characteristic of occurrence</b> | <b>SAF</b> |
|------------|---------------|---------------------------|-------------------------------------|------------|
| 38         | Fem           | 1                         | Provoked                            | No         |
| 63         | Fem           | 3                         | Unprovoked                          | No         |
| 60         | Fem           | 1                         | Unprovoked                          | No         |
| 30         | Male          | 1                         | Unprovoked                          | No         |
| 54         | Fem           | 1                         | Provoked                            | No         |
| 50         | Fem           | 2                         | Provoked                            | No         |
| 24         | Male          | 2                         | Provoked                            | No         |
| 31         | Fem           | 2                         | Provoked                            | No         |
| 40         | Fem           | 1                         | Provoked                            | Yes        |
| 46         | Fem           | 1                         | Provoked                            | No         |
| 59         | Fem           | 2                         | Unprovoked                          | No         |
| 60         | Fem           | 2                         | Unprovoked                          | No         |
| 70         | Fem           | 1                         | Provoked                            | No         |
| 41         | Male          | 1                         | Provoked                            | No         |
| 58         | Fem           | 2                         | Unprovoked                          | No         |
| 51         | Male          | 2                         | Provoked                            | No         |
| 52         | Male          | 2                         | Unprovoked                          | No         |
| 43         | Fem           | 1                         | Provoked                            |            |
| 58         | Fem           | 2                         | Unprovoked                          | No         |
| 57         | Male          | 1                         | Unprovoked                          | No         |
| 55         | Fem           | 1                         | Provoked                            | No         |
| 50         | Fem           | 3                         | Provoked                            | Yes        |
| 61         | Fem           | 1                         | Unprovoked                          | No         |
| 59         | Fem           | 1                         | Provoked                            | No         |
| 45         | Fem           | 2                         | Provoked                            | No         |
| 47         | Fem           | 1                         | Provoked                            | No         |
| 36         | Fem           | 3                         | Unprovoked                          | No         |
| 60         | Male          | 2                         | Provoked                            | No         |
| 65         | Fem           | 1                         | Provoked                            | No         |
| 51         | Fem           | 1                         | Unprovoked                          | No         |
| 34         | Fem           | 1                         | Unprovoked                          | No         |
| 65         | Male          | 1                         | Unprovoked                          | No         |

| <b>Characteristic of re-<br/>occurrence</b> | <b>Time between last<br/>DVT episode and<br/>SPT evaluation<br/>(months)</b> | <b>Anticoagulation</b> | <b>BMI</b> | <b>Abdominal<br/>circuference</b> |
|---------------------------------------------|------------------------------------------------------------------------------|------------------------|------------|-----------------------------------|
| NA                                          | 82                                                                           | No                     | 29,14      | 97                                |
| Unprovoked                                  | 14                                                                           | Yes                    | 39,54      | 130                               |
| NA                                          | 96                                                                           | No                     | 42,72      | 117                               |
| Unprovoked                                  | 47                                                                           | Yes                    | 39,6       | 130                               |
| NA                                          | 93                                                                           | No                     | 38,13      | 119                               |
| Provoked                                    | 20                                                                           | No                     | 34,8       | 111                               |
| Provoked                                    | 68                                                                           | Yes                    | 27,46      | 107                               |
| Unprovoked                                  | 71                                                                           | No                     | 30         | 101                               |
| NA                                          | 130                                                                          | Yes                    | 35,32      | 116                               |
| NA                                          | 57                                                                           | No                     | 33,78      | 100                               |
| Provoked                                    | 60                                                                           | Yes                    | 31,52      | 95                                |
| Unprovoked                                  | 9                                                                            | Yes                    | 31,09      | 108                               |
| NA                                          | 49                                                                           | No                     | 30,7       | 94                                |
| NA                                          | 50                                                                           | No                     | 29,06      | 100                               |
| Unprovoked                                  | 8                                                                            | No                     | 29,34      | 105                               |
| Provoked                                    | 47                                                                           | No                     | 30,07      | 103                               |
| Unprovoked                                  | 276                                                                          | Yes                    | 28,43      | 103                               |
| NA                                          | 52                                                                           | No                     | 21,78      | 74                                |
| Provoked                                    | 15                                                                           | Yes                    | 31,61      | 110                               |
| NA                                          | 19                                                                           | No                     | 29,41      | 110                               |
| NA                                          | 62                                                                           | No                     | 25,19      | 98                                |
| Provoked                                    | 14                                                                           | Yes                    | 32,42      | 104                               |
| NA                                          | 130                                                                          | No                     | 27,85      | 95                                |
| NA                                          | 124                                                                          | No                     | 26,37      | 104                               |
| Provoked                                    | 48                                                                           | Yes                    | 27,48      | 99                                |
| NA                                          | 80                                                                           | Yes                    | 24,66      | 90                                |
| Unprovoked (2) e Provoked (1)               | 4                                                                            | Yes                    | 32,67      | 113                               |
| Provoked                                    | 2                                                                            | Yes                    | 31,23      | 117                               |
| NA                                          | 21                                                                           | No                     | 24,51      | 84                                |
| NA                                          | 60                                                                           | No                     | 31,58      | 93                                |
| NA                                          | 4                                                                            | Yes                    | 30,45      | 100                               |
| NA                                          | 135                                                                          | No                     | 29,76      | 106                               |

| Obesity | Villalta Scale | Ulcer | D-Dimer | FVIII | FVW   | EGF    |
|---------|----------------|-------|---------|-------|-------|--------|
| No      | 19             | No    | 0,38    | 213,6 | 156,4 | 3,8    |
| Yes     | 16             | No    | 0,71    | 278,4 | 285,2 | 17,6   |
| Yes     | 19             | No    | 0,63    | 261,1 | 161,9 | 115,45 |
| Yes     | 15             | No    | 1,32    | 193,8 | 161,3 | 140,19 |
| Yes     | 15             | No    | 0,33    | 162,6 | 114,1 | 109,45 |
| Yes     | 15             | No    | 0,17    | 157   | 117,7 | 154,06 |
| No      | 21             | Yes   | 0,17    | 210   | 154,8 | 144,13 |
| Yes     | 17             | No    | 0,28    | 133,9 | 122,3 | 285,35 |
| Yes     | 20             | No    | 0,17    |       | 122,5 | 20,21  |
| Yes     | 20             | No    | 0,5     | 234   | 216,4 | 72,68  |
| Yes     | 18             | No    | 0,38    | 130   | 102,6 | 247,74 |
| Yes     | 15             | No    | 0,17    | 176,7 | 154,5 | 75,63  |
| Yes     | 16             | No    | 0,39    | 207,5 | 144,8 | 113,46 |
| No      | 20             | Yes   | 4,52    | 121,1 | 113,5 | 110,06 |
| No      | 16             | No    | 0,33    | 124,8 | 124,6 | 141,44 |
| Yes     | 13             | Yes   | 0,54    | 150,2 | 120,7 | 178,18 |
| No      | 13             | Yes   | 0,27    |       |       | 106,23 |
| No      | 15             | No    | 0,1     | 165,7 | 190,5 | 174,06 |
| Yes     | 18             | No    | 0,22    | 196,1 | 136,8 | 212,86 |
| No      | 14             | Yes   | 0,52    | 385,5 | 152,4 | 3,8    |
| No      | 16             | No    | 0,26    | 216,8 | 156,6 | 3,8    |
| Yes     | 19             | No    | 0,08    | 212,6 | 137,7 | 131,77 |
| No      | 14             | Yes   | 0,3     | 174,6 | 135   | 161,74 |
| No      | 22             | No    | 1,25    | 237,6 | 368   | 56,5   |
| No      | 15             | No    | 1,05    | 176,7 | 145,9 | 134,39 |
| No      | 15             | No    | 0,26    | 141,3 | 125   | 51,47  |
| Yes     | 19             | No    | 0,23    | 229   | 198,6 | 160,86 |
| Yes     | 19             | No    | 6,04    | 126,7 | 132,8 | 40,63  |
| No      | 23             | No    | 0,52    | 196,8 | 168   | 3,8    |
| Yes     | 15             | Yes   | 0,14    | 193,7 | 139,4 | 281,61 |
| Yes     | 22             | No    | 0,06    | 158,2 | 111,6 | 29,57  |
| No      | 16             | No    | 0,26    | 97,7  | 95    | 33,74  |

| Endotelin-1 | FGF-1 | VEGF-C | VEGF-D | VEGF (Total?) | MCP-1   |
|-------------|-------|--------|--------|---------------|---------|
| 32,61       | 13    | 73,51  | 9      | 10            | 5,6     |
| 3           | 13    | 102,79 | 9      | 4359,53       | 291,54  |
| 3           | 13    | 151,52 | 90,55  | 94,19         | 199,42  |
| 3           | 13    | 204,37 | 347,05 | 72,96         | 294,42  |
| 41,2        | 36,67 | 362,77 | 55,19  | 662,33        | 4       |
| 3           | 13    | 127,92 | 380,53 | 10            | 387,03  |
| 3           | 13    | 184,29 | 9      | 47,97         | 15,39   |
| 3           | 13    | 78,66  | 88,02  | 10            | 1257,08 |
| 3           | 13    | 189,36 | 9      | 432,01        | 809,67  |
| 3           | 13    | 71,77  | 150,48 | 10            | 634,95  |
| 23,49       | 13    | 179,17 | 9      | 10            | 452,95  |
| 3           | 13    | 205,61 | 58,97  | 10            | 885,26  |
| 3           | 13    | 91,81  | 9      | 10            | 392,82  |
| 14,14       | 13    | 31,54  | 9      | 105,31        | 582,12  |
| 3           | 13    | 93,41  | 221,65 | 10            | 646,06  |
| 3           | 13    | 155,56 | 114,68 | 171,02        | 464,1   |
| 19,32       | 13    | 55,22  | 300,5  | 10            | 609,88  |
| 3           | 13    | 114,85 | 450,78 | 10            | 709,98  |
| 66,83       | 13    | 186,83 | 242,55 | 179,64        | 1003,07 |
| 3           | 13    | 73,51  | 239,94 | 10            | 255,82  |
| 3           | 13    | 156,89 | 149,2  | 801,98        | 894,77  |
| 3           | 13    | 125,06 | 36,3   | 171,02        | 747,52  |
| 3           | 13    | 113,36 | 9      | 408,71        | 1707,26 |
| 26,27       | 13    | 98,76  | 616,16 | 262,42        | 744,34  |
| 3           | 13    | 55,28  | 9      | 10            | 583,92  |
| 3           | 13    | 56,28  | 463,91 | 72,96         | 624,53  |
| 2,32        | 5,32  | 110,9  | 118,9  | 89,13         | 634,14  |
| 3           | 13    | 64,2   | 224,88 | 225,68        | 675,05  |
| 3           | 13    | 46,2   | 53,89  | 32,67         | 524,21  |
| 3           | 13    | 85,5   | 28,4   | 83,91         | 666,37  |
| 3           | 13    | 68,12  | 9      | 10            | 13,61   |
|             |       | 64,2   | 135,81 | 122,19        | 15,96   |

| <b>TNF-Alfa</b> | <b>IL-1b</b> | <b>IL-6</b> | <b>IL-8</b> | <b>IL-10</b> |
|-----------------|--------------|-------------|-------------|--------------|
| 3               | 0,3          | 3           | 3           | 3            |
| 7,02            | 0,3          | 104,02      | 108,09      | 3            |
| 4,94            | 0,91         | 3           | 13,52       | 3            |
| 9,97            | 0,3          | 3           | 2,51        | 3            |
| 3               | 1,02         | 3           | 3,36        | 3            |
| 8,47            | 0,3          | 3           | 3,06        | 3            |
| 3,43            | 2,18         | 10,18       | 3           | 21,75        |
| 16              | 0,3          | 3           | 4,89        | 3            |
| 19,21           | 51,72        | 25,8        | 67,45       | 7,49         |
| 12,06           | 0,3          | 3           | 13,97       | 3            |
| 8,52            | 0,3          | 3           | 11,69       | 26,44        |
| 8,78            | 0,3          | 3           | 10,21       | 3            |
| 4,67            | 0,3          | 3           | 6,56        | 3            |
| 10,53           | 0,3          | 3           | 11,91       | 3            |
| 13,06           | 0,3          | 3           | 3,71        | 3            |
| 9,5             | 0,3          | 3           | 4,34        | 3            |
| 7,66            | 0,3          | 3           | 3           | 3            |
| 6,23            | 0,3          | 3           | 8,46        | 3            |
| 17,51           | 0,3          | 3           | 5,68        | 3            |
| 9,82            | 0,3          | 3           | 4,1         | 3            |
| 25,05           | 0,3          | 7,98        | 22,08       | 3            |
| 13,56           | 0,3          | 3           | 15,77       | 3            |
| 15,61           | 0,3          | 3           | 154,42      | 3            |
| 10,6            | 0,3          | 3           | 13,39       | 3            |
| 9,44            | 0,3          | 3           | 13,71       | 3            |
| 3               | 0,3          | 3           | 25,66       | 3            |
| 7,76            | 0,3          | 3           | 11,53       | 3            |
| 13,43           | 0,97         | 3           | 24,62       | 3            |
| 4,67            | 0,8          | 3           | 1           | 3            |
| 12,94           | 0,3          | 3           | 8,65        | 3            |
| 2,15            | 0,3          | 3           | 3           | 3            |
| 3               | 0,3          | 3           | 2,93        | 3            |

| <b>IL-13</b> | <b>FGF-2</b> | <b>MMP-1</b> | <b>MMP-2</b> | <b>MMP-3</b> |
|--------------|--------------|--------------|--------------|--------------|
| 3            | 3            | 2527,1       | 150530,35    | 8831,72      |
| 103,23       | 40,74        | 1619,25      | 195287,65    | 27458,46     |
| 3            | 15,14        | 21095,13     | 231575,28    | 7468,77      |
| 3            | 26,87        | 7851,14      | 131300,37    | 14931,37     |
| 3            | 19,24        | 7726,8       | 164917,2     | 8152,23      |
| 3            | 9,16         | 23068,31     | 150282,72    | 20050,76     |
| 3            | 25,64        | 10363,05     | 134395,52    | 14248,18     |
| 3            | 12,24        | 3290,29      | 116519,03    | 12418,56     |
| 457,42       | 109,47       | 9022,8       | 123718,48    | 14727,25     |
| 3            | 3            | 5026,29      | 161057,47    | 12398,26     |
| 3            | 3            | 6398,49      | 150777,85    | 23154,26     |
| 3            | 3            | 7835,59      | 259104,46    | 14936,48     |
| 3            | 3            | 6321,75      | 105014,75    | 17418,87     |
| 3            | 60,43        | 5877,81      | 148794,09    | 22269,18     |
| 3            | 3            | 4754,31      | 195969,92    | 11087,92     |
| 3            | 3            | 9983,35      | 187270,13    | 27787,25     |
| 3            | 3            | 5893,09      | 140770,03    | 33708,01     |
| 3            | 3            | 5481,49      | 185653,45    | 27571,8      |
| 3            | 88,03        | 7308,11      | 156189,97    | 9906,5       |
| 3            | 3            | 977,93       | 145925,05    | 44751,2      |
| 52,92        | 781,48       | 1755,97      | 124631,69    | 23599,19     |
| 3            | 80,77        | 7083,41      | 178570,29    | 17144,39     |
| 3            | 3            | 9007,11      | 151766,54    | 14365,33     |
| 3            | 64,82        | 6598,27      | 392565,93    | 10579,25     |
| 3            | 3            | 3379,02      | 171602,28    | 15980,51     |
| 3            | 3            | 3438,25      | 184264,12    | 18344,72     |
| 3            | 3            | 3839,46      | 129483,75    | 14125,99     |
| 3            | 39,63        | 6798,42      | 174913,22    | 16963,66     |
| 3            | 76,11        | 2895,74      | 182612,71    | 16239,54     |
| 3            | 5,78         | 8019,34      | 140116,18    | 15435,72     |
| 3            | 30,48        | 1090,94      | 134228,94    | 8722,66      |
| 3            | 3            | 3054,32      | 156189,97    | 13342,83     |

| <b>MMP-7</b> | <b>MMP-9</b> | <b>MMP-10</b> | <b>MMP-12</b> | <b>MMP-13</b> |
|--------------|--------------|---------------|---------------|---------------|
| 6158,37      | 84856,88     | 329,35        | 32,99         | 10            |
| 7285,23      | 83923,91     | 376,64        | 112,52        | 178,33        |
| 9867,65      | 72187,48     | 623,31        | 106,7         | 243,79        |
| 6158,37      | 126986,16    | 482,13        | 322,33        | 596,12        |
| 7374,41      | 83032,9      | 363,26        | 233,5         | 718,84        |
| 9522,75      | 197730,23    | 452,41        | 234,84        | 420,49        |
| 5331,19      | 109204,53    | 509,32        | 191,34        | 305,24        |
| 9695,38      | 321650,89    | 794,65        | 126,93        | 10            |
| 9089,52      | 114470,01    | 718,45        | 174,79        | 58,55         |
| 9002,58      | 89666,34     | 699,41        | 194,09        | 339,06        |
| 13247,14     | 127510,09    | 376,64        | 199,57        | 475,41        |
| 6882,21      | 47249,11     | 357,72        | 213,2         | 412,52        |
| 10253,95     | 61993,64     | 338,8         | 94,95         | 58,55         |
| 7818,41      | 92128,08     | 433,46        | 988,72        | 83,23         |
| 11233,55     | 328475,59    | 1329,71       | 158,07        | 158,59        |
| 5884,27      | 68660,11     | 547,29        | 144           | 225,57        |
| 10851,48     | 271310,34    | 585,29        | 202,3         | 83,23         |
| 5792,55      | 92981,66     | 851,85        | 112,52        | 10            |
| 6792,26      | 115097,01    | 357,72        | 196,83        | 188,01        |
| 10998,91     | 22198,02     | 572,5         | 881,94        | 2446,35       |
| 4297,19      | 243782,96    | 271,57        | 80,43         | 235,49        |
| 9821,47      | 154694,77    | 590,41        | 272,77        | 274,96        |
| 10296,76     | 81784,79     | 547,29        | 213,2         | 396,47        |
| 9176,36      | 64369,79     | 509,32        | 207,76        | 288,01        |
| 9996,61      | 93957,79     | 509,32        | 90,51         | 188,01        |
| 8391,08      | 262055,47    | 1540,54       | 42,81         | 10            |
| 10039,56     | 146407,96    | 547,29        | 205,03        | 690,39        |
| 9089,52      | 71113,97     | 282,13        | 402,58        | 452,06        |
| 7641,72      | 50739,71     | 341,68        | 275,54        | 24,14         |
| 8592,58      | 347696,82    | 302,08        | 58,72         | 10            |
| 5754,34      | 128215,86    | 412,27        | 245,12        | 10            |
| 8566,33      | 149755,35    | 928,16        | 207,76        | 243,79        |

| <b>PDGF-AA</b> | <b>PDGF-AB/BB</b> | <b>RANTES</b> | <b>PAI-1 (Total)</b> | <b>sP-selectina</b> |
|----------------|-------------------|---------------|----------------------|---------------------|
| 1862           | 31163,71          | 47916,05      | 251806,14            | 6,77                |
| 2510,99        | 34039,87          | 85514,55      | 290285,34            | 81,65               |
| 4023,64        | 40971,16          | 125418,57     | 368656,89            | 97,19               |
| 4452,17        | 34764,37          | 80435,97      | 415145,05            | 157,89              |
| 3663,11        | 37549,79          | 83778,11      | 306135,52            | 64,81               |
| 4218,09        | 26410,43          | 175824,48     | 333884,63            | 138,89              |
| 3401,63        | 16854,38          | 130983,2      | 312742,48            | 81,65               |
| 3782,93        | 16675,66          | 50724,2       | 351212,23            | 132,33              |
| 4417,36        | 33928,2           | 109921,23     | 374675,44            | 104,58              |
| 3815,77        | 28260,07          | 45618,85      | 197432,02            | 85,64               |
| 3267,9         | 44774,39          | 75922,58      | 326738,05            | 108,2               |
| 3325,51        | 16794,78          | 93800,5       | 260968,15            | 138,89              |
| 2773,09        | 25208,26          | 51923,86      | 298566,69            | 118,78              |
| 1864,79        | 13333,17          | 27400,09      | 218207,54            | 111,78              |
| 3850,23        | 22765,86          | 101131,06     | 305891,08            | 104,58              |
| 2882,07        | 18716,37          | 39254,8       | 232938,86            | 95,69               |
| 2890,94        | 15373,3           | 33644,94      | 395318,5             | 223,74              |
| 1194,97        | 22331,22          | 22979,83      | 191831,4             | 55,7                |
| 2714,48        | 8351,07           | 163786,57     | 313722,49            | 64,81               |
| 1000           | 865,05            | 2761,36       | 181807,19            | 204,22              |
| 3226,79        | 20458,85          | 72199,01      | 238275,91            | 147,72              |
| 4434,45        | 26809,19          | 83745,06      | 521744               | 84,93               |
| 3394           | 26537,43          | 60337,47      | 278385,21            | 142,13              |
| 3954,06        | 41106,17          | 156403,08     | 380440,43            | 125,63              |
| 2965,04        | 14844,86          | 73444,05      | 363036,3             | 193,39              |
| 3252,77        | 16378,37          | 65165,25      | 284451,72            | 97,19               |
| 3872,2         | 42324,03          | 97121,77      | 429497,84            | 170,05              |
| 3012,64        | 28837,61          | 25027,34      | 267732,18            | 111,78              |
| 2010,02        | 15606,13          | 52470,31      | 218913,65            | 19,46               |
| 5518,22        | 26982,99          | 75771,59      | 431560,9             | 130,66              |
| 3183,79        | 19613,66          | 34326,31      | 260650,02            | 97,47               |
| 2705,7         | 18474,59          | 21466,11      | 266281,78            | 84,93               |



| <b>sICAM-1</b> | <b>sVCAM-1</b> | <b>TGF-Beta - 1</b> | <b>TGF-Beta - 2</b> |
|----------------|----------------|---------------------|---------------------|
| 47,64          | 336,59         | 97838,51            | 6272,05             |
| 41,61          | 304,55         | 59692,4             | 3928,69             |
| 55,39          | 453,71         | 56382,77            | 1268,49             |
| 84,52          | 389,09         | 1197,72             | 907,3               |
| 59,21          | 559,86         | 4637,91             | 1268,49             |
| 86,72          | 401,82         | 126612,11           | 8874,34             |
| 56,07          | 363,75         | 152643,56           | 7053,06             |
| 51,56          | 253,37         | 143110,12           | 4819,72             |
| 48,03          | 420,44         | 128882,83           | 11173,46            |
| 66,23          | 518,57         | 77323,56            | 4819,72             |
| 59,57          | 460,66         | 107505,63           | 7165,44             |
| 49,42          | 435,47         |                     |                     |
| 67,08          | 363,18         | 16353,44            | 2949,39             |
| 179,23         | 275,32         | 39232,82            | 2167,05             |
| 48,24          | 382,08         | 82793,08            | 5971,31             |
| 51,54          | 465,59         | 71248,72            | 5787,39             |
| 70,69          | 368,17         | 50097,97            | 3579,96             |
| 59,39          | 411,5          | 31683,85            | 2813,48             |
| 53,61          | 283,31         | 40123,81            | 4041,11             |
| 171,42         | 506,02         |                     |                     |
| 55,65          | 546,58         | 56141,02            | 3499,82             |
| 40,96          | 553,15         | 82261,92            | 3737,22             |
| 46,09          | 442,54         | 56636,93            | 5474,39             |
| 62,12          | 574,4          | 42903,16            | 2478,94             |
| 49,1           | 485,26         | 54579,49            | 2813,48             |
| 67,43          | 443,14         | 21541,33            | 2720,56             |
| 61,02          | 356,87         | 20                  | 797,27              |
| 127,45         | 486,09         | 74013,47            | 4579,71             |
| 65,64          | 453,43         | 13662,69            | 5249,96             |
| 138,7          | 688,33         | 168698,73           | 7109,35             |
| 71,41          | 614,16         | 11632,95            | 1346,63             |
| 64,62          | 735,04         | 46777,18            | 2949,39             |

| <b>TGF-Beta - 3</b> | <b>TIMP-1</b> | <b>TIMP-2</b> | <b>PCR</b> | <b>HBGLI</b> | <b>VHS</b> |
|---------------------|---------------|---------------|------------|--------------|------------|
| 20                  | 77398,23      | 51776,05      | 0,6        | 5,2          | 17         |
| 20                  | 109480,2      | 67253,7       | 2,16       | 5,9          | 64         |
| 20                  | 131145,82     | 59171,74      | 0,11       | 6            | 14         |
| 20                  | 169100,31     | 52790,01      | 0,81       | 5,5          | 6          |
| 20                  | 120793,86     | 50759,95      | 0,51       | 7,3          | 2          |
| 20                  | 91369,25      | 41749,05      | 0,7        | 6,1          | 13         |
| 20                  | 80864,76      | 39517,68      | 1          | 5,6          | 3          |
| 461,11              | 119635,61     | 54138,91      | 0,4        | 5,7          | 14         |
| 867,79              | 70034,13      | 39649,52      | 0,25       | 5,9          | 20         |
| 680                 | 83947,53      | 50759,95      | 0,37       | 7,6          | 23         |
| 680                 | 119279,88     | 61468,08      | 0,19       | 5,5          | 11         |
| 439,9               | 128488,11     | 62218,54      | 0,13       | 6,2          | 8          |
| 439,9               | 137100,73     | 66671,77      | 0,24       | 5,6          | 6          |
| 439,9               | 132122,79     | 55400,62      | 0,6        | 5            | 3          |
| 569,85              | 112746,92     | 43485,45      | 1,52       | 5,9          | 2          |
| 439,9               | 91096,89      | 47739,8       | 0,32       | 9,7          | 9          |
| 569,85              | 86618,06      | 44263,29      | 1,43       |              | 9          |
| 867,79              | 132757,44     | 61968,44      | 0,04       | 5            | 5          |
| 439,9               | 66695,04      | 43398,89      | 0,6        | 6,9          | 25         |
| 20                  | 81479,61      | 54812,15      | 1,25       | 6,4          | 45         |
| 20                  | 85698,85      | 42878,98      | 0,21       | 6,2          | 8          |
| 680                 | 86246,3       | 63843,06      | 0,28       | 6,1          | 10         |
| 20                  | 104296,65     | 39473,71      | 0,46       | 5,6          | 46         |
| 439,9               | 192779,34     | 121751,65     | 0,22       | 6,3          | 2          |
| 439,9               | 114614,6      | 85993,68      | 0,36       | 5,3          | 5          |
| 20                  | 74780,45      | 75815,1       | 0,12       | 5,2          | 2          |
| 20                  | 110463,2      | 80851,9       | 1,11       | 6,9          | 40         |
| 20                  | 128395,16     | 88569,05      | 0,31       | 5,5          | 6          |
| 289,62              | 109733,18     | 75524,66      | 1,11       |              |            |
| 20                  | 103602,74     | 73879         | 0,9        |              |            |
| 20                  | 92311,13      | 71991,49      | 1,54       |              |            |
| 20                  | 101262,16     | 69280,99      | 1,74       | 9            | 12         |
